# Supplementary material for: Ammonia and formate cosynthesis via nitrate electroreduction combined with methanol electrooxidation over nitrogen-doped carbon-encapsulated nickel iron phosphide
Source: Royal Society of Chemistry journal article supplement (doi:10.1039/d4qi02350a), 2024-01-01
Supplement: d4qi02350a1.pdf [file d4qi02350a1.pdf]

*Supporting Information for*

**Ammonia and formate cosynthesis via nitrate electroreduction combined methanol electrooxidation over nitrogen doped carbon encapsulated nickel iron phosphide**

Zongyi Wang, Jiuli Chang\* and Zhiyong Gao\*

School of Chemistry and Chemical Engineering, Collaborative Innovation Center of Henan Province for Green Manufacturing of Fine Chemicals, Key Laboratory of Green Chemical Media and Reactions, Ministry of Education, Henan Normal University, Henan Xinxiang 453007, P.R. China.

\*Corresponding authors:

E-mail: [jiulichang@163.com](mailto:jiulichang@163.com) (J. Chang) Tel./Fax: +86 373 3326335;

[zygao512@163.com](mailto:zygao512@163.com) (Z. Gao) Tel./Fax: +86 373 3326335

**Fig. S1**

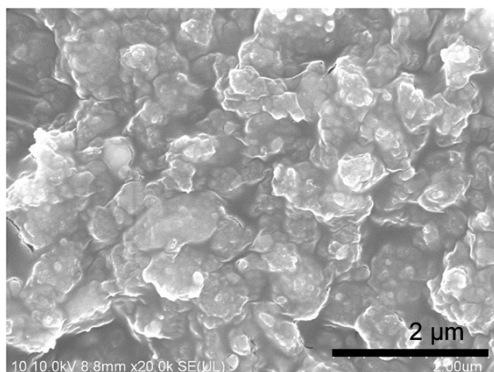

**Fig. S1** SEM of NiFeP@NC.

**Fig. S2**

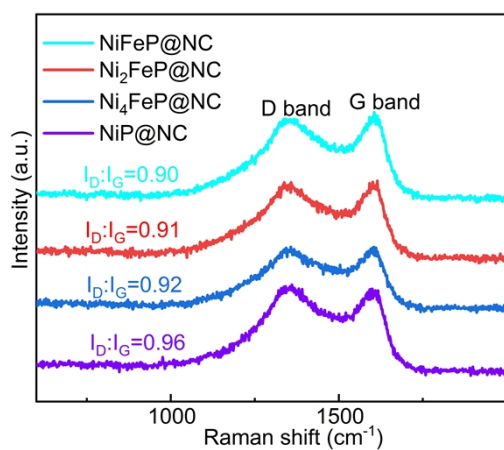

**Fig. S2** Raman spectra of Ni<sub>x</sub>FeP@NCs.

**Fig. S3**

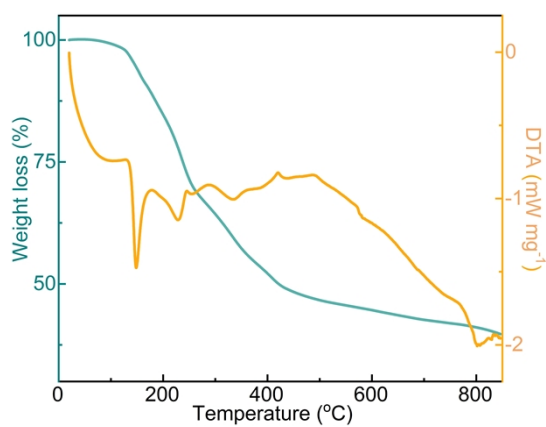

**Fig. S3** TG-DTA of Ni<sub>2</sub>FeP@NC precursor.

**Fig. S4**

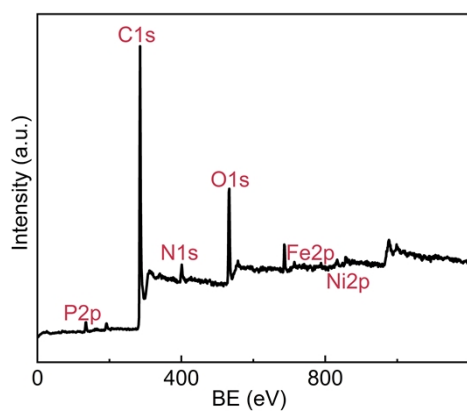

**Fig. S4** Survey XPS of Ni<sub>2</sub>FeP@NC.

**Fig. S5**

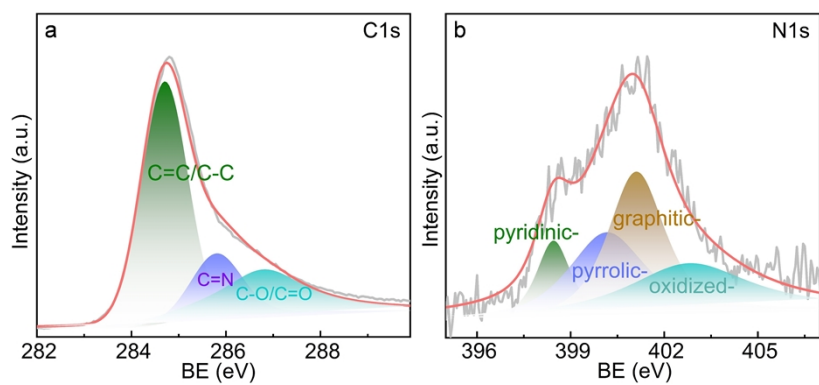

**Fig. S5** (a) C1s and (b) N1s XPS of Ni<sub>2</sub>FeP@NC.

**Fig. S6**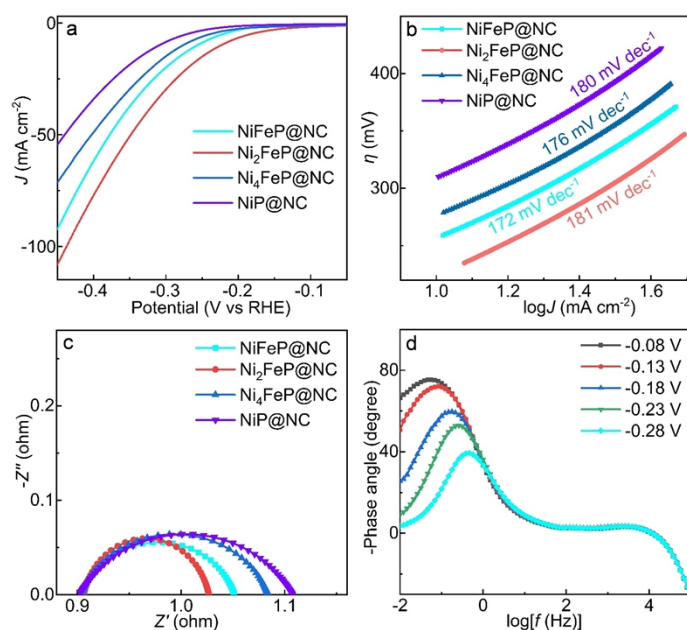

**Fig. S6** (a) LSVs at  $5 \text{ mV s}^{-1}$ , (b) Tafel plots and (c) Nyquist impedance of different electrodes for HER. (d) Potential dependent Bode phase plots of  $\text{Ni}_2\text{FeP@NC}$  electrode.

From the LSVs shown in Fig. S6a, the more prominent cathodic response and more positive onset potential indicate the highest HER catalytic behavior of the  $\text{Ni}_2\text{FeP@NC}$  electrode. Fig. S6b depicts the Tafel plots of the electrodes, the high Tafel slopes (over  $120 \text{ mV dec}^{-1}$ ) indicate the Volmer step ( $\text{H}_2\text{O} + \text{e} + * = *-\text{H} + \text{OH}^-$ , \* represents the catalytic site), namely the generation of the first adsorbed active H ( $\text{H}_{\text{ads}}$ ) is the kinetically limiting step during HER process. In this situation, if the  $\text{H}_{\text{ads}}$  is captured by the incorporated  $\text{NO}_3^-$ , hydrogenation reaction can be ensured, which restricts the competing HER toward  $\text{H}_2$  bubble. Fig. S6c shows the electrochemical impedance spectra (EISs) of the electrodes, the lowest charge transfer resistance ( $R_{\text{ct}}$ ) indicates the highest HER kinetics of the  $\text{Ni}_2\text{FeP@NC}$  electrode. Fig. S6d presents the potential dependent Bode phase plots of impedance, the well-defined phase angle peak at low frequency range are observable in negative potential, the phase angle decreases and the frequency upshifts with negative shift of potential, showing the expedited HER at more negative potentials. The unvaried phase angle platform at around  $10^4 \text{ Hz}$  excludes the structural evolution of  $\text{Ni}_2\text{FeP@NC}$  catalyst during HER process.

**Fig. S7**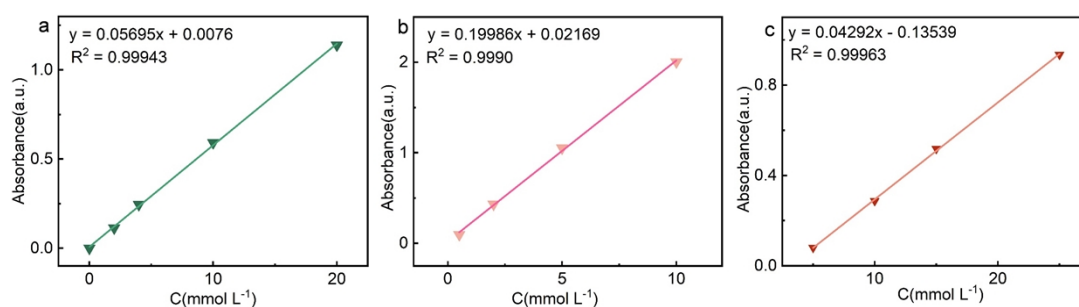

**Fig. S7** Absorbance vs concentration working curves of (a)  $\text{NH}_4^+$  (at 654 nm), (b)  $\text{NO}_2^-$  (at 540 nm) and (c)  $\text{NO}_3^-$  ( $A=A_{220\text{nm}}-2A_{275\text{nm}}$ ). The concrete detection methods were depicted in experimental section in main text.

**Fig. S8**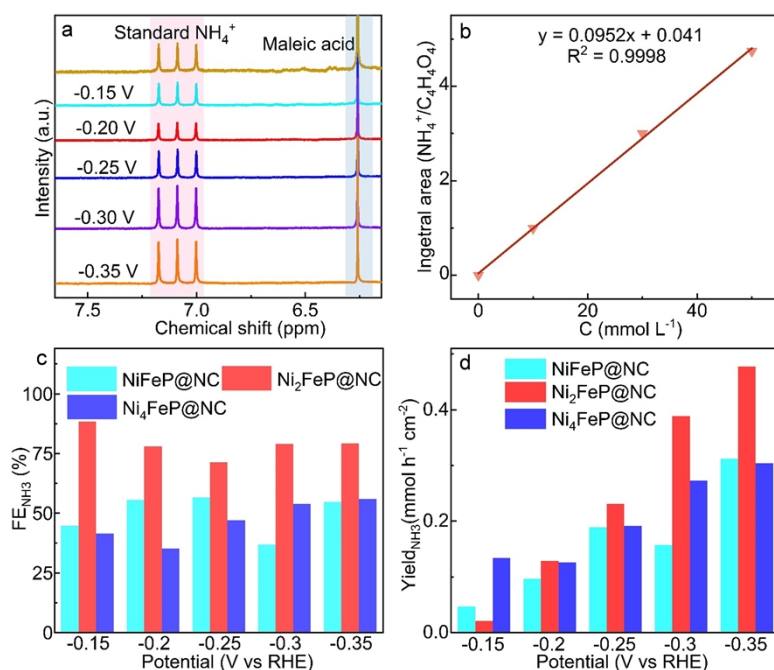

**Fig. S8** (a) <sup>1</sup>H NMR of standard  $\text{NH}_4^+$  ( $\text{NH}_4\text{Cl}$ ) and the electrolyte (1 M KOH+0.2 M  $\text{KNO}_3$ ) undergoes electroreduction at different potentials for 2 h catalyzed by  $\text{Ni}_2\text{FeP@NC}$ . (b) Concentration vs integral area of the peak at 7.09 ppm (middle peak) relative to maleic acid ( $\text{C}_4\text{H}_4\text{O}_4$ ). Potential dependent (c)  $\text{FE}_{\text{NH}_3}$  and (d)  $\text{Yield}_{\text{NH}_3}$  via  $\text{NO}_3\text{RR}$  catalyzed by  $\text{Ni}_x\text{FeP@NC}$ s electrodes.

As viewed in Fig. S8a, the <sup>1</sup>H NMR of the electrolyte undergoes  $\text{NO}_3\text{RR}$  at different potentials feature typical triplet peaks free of impurity signals, which are finely coincide with the standard  $\text{NH}_4^+$ , showing the production of  $\text{NH}_3$  by  $\text{NO}_3\text{RR}$  at  $\text{Ni}_2\text{FeP@NC}$ . Estimated based on the relative integral areal vs concentration working curve shown in Fig. S8b, the FEs of  $\text{Ni}_2\text{FeP@NC}$  for  $\text{NO}_3\text{RR}$  are 79~89% within -0.15~0.35 V (Fig. S8c), the maximized  $\text{FE}_{\text{NH}_3}$  of 89% achieves at -0.15 V, which is largely similar to that calculated by colorimetric method (93%). Despite the existence of

methodological disparities, these results still evidence the high electricity-to-NH<sub>3</sub> conversion ratio by NO<sub>3</sub>RR. The FE<sub>NH<sub>3</sub>S</sub> of other electrodes are also similar to the values estimated from colorimetric method with minor deviations. The yield<sub>NH<sub>3</sub>S</sub> vary within 0.02~0.477 mmol h<sup>-1</sup> cm<sup>-2</sup> as potential negatively changes from -0.15 to -0.35 V at Ni<sub>2</sub>FeP@NC electrode. The maximized yield<sub>NH<sub>3</sub></sub> at -0.35 V is very similar to that calculated from colorimetric method (0.47 mmol h<sup>-1</sup> cm<sup>-2</sup>).

**Fig. S9**

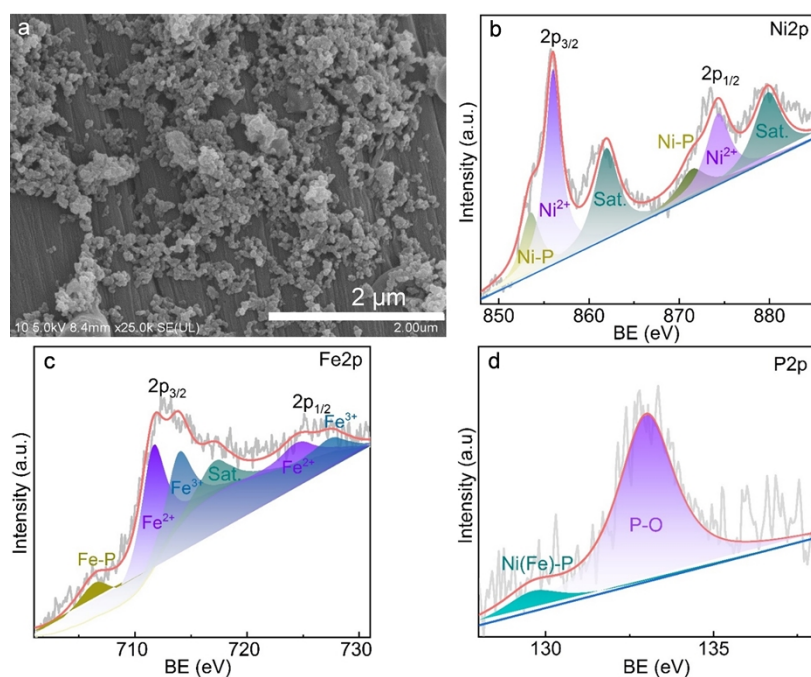

**Fig. S9** (a) SEM, (b) Ni<sub>2</sub>p, (c) Fe<sub>2</sub>p and (d) P<sub>2</sub>p XPS of Ni<sub>2</sub>FeP@NC after 5 cycles of NO<sub>3</sub>RR operations.

From Fig. S9a, the SEM of Ni<sub>2</sub>FeP@NC still demonstrates aggregated nanoparticles, which resemble to its initial state, showing the fine morphological stability undergoes repeated NO<sub>3</sub>RR cycles. In addition, the Ni(Fe)-P bonds can be observed from the Ni<sub>2</sub>p, Fe<sub>2</sub>p and P<sub>2</sub>p XPS spectra (Fig. S9b~d), which are in line with the elemental composition of phosphide component in the hybrid. The Ni<sup>2+</sup>, Fe<sup>2+</sup>, Fe<sup>3+</sup> and phosphate species are also observable after repeated NO<sub>3</sub>RR operations. The overall XPS results after NO<sub>3</sub>RR maintain roughly unvaried relative their initial forms. The unvaried morphology and stable elemental composition of Ni<sub>2</sub>FeP@NC contribute partially to the NO<sub>3</sub>RR durability.

**Fig. S10**

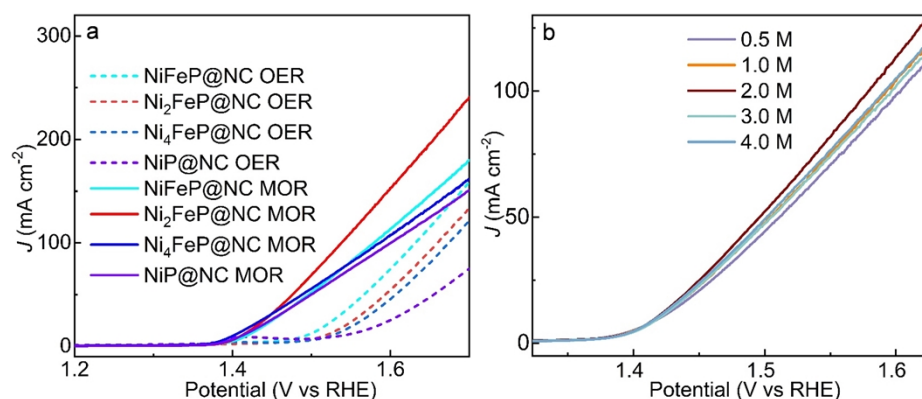

**Fig. S10** (a) LSVs of different electrodes at 5 mV s<sup>-1</sup> in 1 M KOH (dash curves) and 1 M KOH+2 M CH<sub>3</sub>OH (solid curves). (b) LSV of Ni<sub>2</sub>FeP@NC electrode at 5 mV s<sup>-1</sup> in 1 M KOH electrolyte containing different concentrations of CH<sub>3</sub>OH.

**Fig. S11**

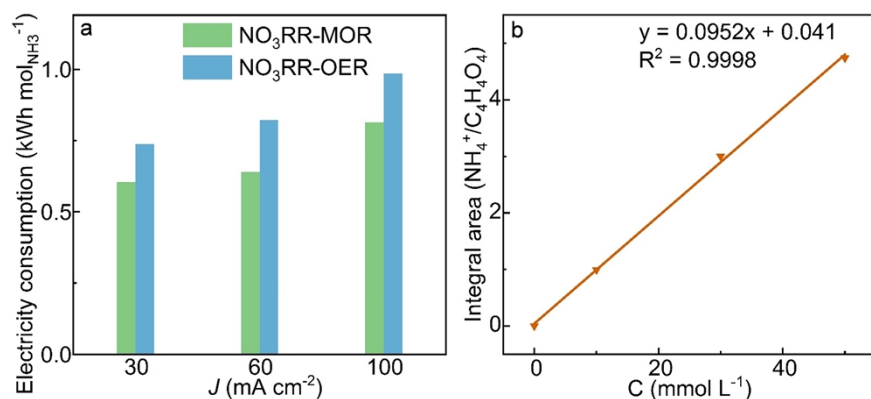

**Fig. S11** (a) Electricity consumptions of NO<sub>3</sub>RR-MOR and NO<sub>3</sub>RR-OER electrolyzers estimated by chronopotentiometry ( $V-t$  operations) at  $J=30, 60$  and  $100$  mA cm<sup>-2</sup> for 2 h. (b) Integral <sup>1</sup>H NMR area ratio of NH<sub>4</sub><sup>+</sup>/inner standard maleic acid versus concentration working curve.

**Table S1** Comparative MOR performances of representative catalytic electrodes in 1 M KOH electrolyte

| <b>Electrode</b>                                                                                                                               | <b>Potential</b>                           | <b>Ref.</b> |
|------------------------------------------------------------------------------------------------------------------------------------------------|--------------------------------------------|-------------|
| Co <sub>x</sub> P@NiCo-LDH/NF                                                                                                                  | 1.24 V at $J=10$ mA cm <sup>-2</sup>       | [1]         |
| Amorphous Ni <sub>2</sub> Co <sub>2</sub> Fe <sub>1</sub> -P                                                                                   | 1.39 V at $J=20$ mA cm <sup>-2</sup>       | [2]         |
| Os-Ni <sub>x</sub> P/N-C/NF                                                                                                                    | 1.38 V at $J=10$ mA cm <sup>-2</sup>       | [3]         |
| MoN/Ni <sub>3</sub> N/NF                                                                                                                       | 1.38 V at $J=100$ mA cm <sup>-2</sup>      | [4]         |
| Cu <sub>2-x</sub> Se@CuO NFs                                                                                                                   | 1.31 V at $J=50$ mA cm <sup>-2</sup>       | [5]         |
| CoPPi                                                                                                                                          | 1.29 V at $J=100$ mA cm <sup>-2</sup>      | [6]         |
| CoFe@PANI                                                                                                                                      | About 1.4 V at $J=10$ mA cm <sup>-2</sup>  | [7]         |
| NiCu@Cu                                                                                                                                        | 1.37 V at $J=10$ mA cm <sup>-2</sup>       | [8]         |
| La <sub>0.7</sub> Sr <sub>0.3</sub> Co <sub>0.2</sub> Mn <sub>0.2</sub> Ni <sub>0.2</sub> Fe <sub>0.2</sub> Al <sub>0.2</sub> O <sub>3-x</sub> | 1.45 V at $J=10$ mA cm <sup>-2</sup>       | [9]         |
| CeO <sub>2</sub> @INF-0.6                                                                                                                      | 1.47 V at $J=100$ mA cm <sup>-2</sup>      | [10]        |
| Ba <sub>0.5</sub> Sr <sub>0.5</sub> Co <sub>0.8</sub> Fe <sub>0.2</sub> O <sub>3-δ</sub> @CeO <sub>2</sub> -10                                 | 1.39 V at $J=10$ mA cm <sup>-2</sup>       | [11]        |
| NiFeO <sub>x</sub>                                                                                                                             | About 1.52 V at $J=10$ mA cm <sup>-2</sup> | [12]        |
| Ni <sub>2</sub> FeP@NC                                                                                                                         | 1.41 V at $J=10$ mA cm <sup>-2</sup>       | This work   |



## References

- [1] M. Li, X.H. Deng, Y. Liang, K. Xiang, D. Wu, B. Zhao, H.P. Yang, J.L. Luo, X.Z. Fu,  $\text{Co}_x\text{P}@Ni\text{Co-LDH}$  heteronanoshet arrays as efficient bifunctional electrocatalysts for co-generation of value-added formate and hydrogen with less-energy consumption, *J. Energy Chem.* 2020, 50, 314–323.
- [2] J.L. Chang, W.Y. Wang, D.P. Wu, F. Xu, K. Jiang, Y.M. Guo, Z.Y. Gao, Self-supported amorphous phosphide catalytic electrodes for electrochemical hydrogen production coupling with methanol upgrading, *J. Colloid Interf. Sci.* 2023, 648, 259–269.
- [3] Z.Y. Duan, T.L. Ren, Q.Q. Mao, H.J. Yu, K. Deng, Y. Xu, Z.Q. Wang, L. Wang, H.J. Wang, Metal-organic framework derived Os-doped  $\text{Ni}_x\text{P}/\text{N}$ -doped carbon composite nanosheet arrays toward boosting methanol oxidation into value added chemicals coupled with hydrogen production, *J. Mater. Chem. A* 2022, 10, 18126–18131.
- [4] Y. Zhou, K.F. Zhao, C.H. Shi, H.J. Ma, D.W. Yuan, Z.G. Yi, Efficient hydrogen evolution electrocatalyst:  $\text{MoN}/\text{Ni}_3\text{N}/\text{NF}$  coupled with methanol oxidation reaction for formate production in alkaline media, *J. Electrochem. Soc.* 2024, 171, 056506.
- [5] X. Li, Q.S. Chen, W. Sun, C.C. He, Z.H. Wen, Electron-efficient Co-electrosynthesis of formates from  $\text{CO}_2$  and methanol feedstocks, *Angew. Chem. Int. Ed.* 2024, e202412410.
- [6] D. Gupta, A. Kafle, T.C. Nagaiah, Dinitrogen reduction coupled with methanol oxidation for low overpotential electrochemical  $\text{NH}_3$  synthesis over cobalt pyrophosphate as bifunctional catalyst, *Small* 2023, 19, 2208272.
- [7] M.M. Rajpure, H.S. Jadhav, H. Kim, Layer interfacing strategy to derive free standing  $\text{CoFe}@PANI$  bifunctional electrocatalyst towards oxygen evolution reaction and methanol oxidation reaction, *Journal of Colloid And Interface Science* 2024, 653, 949–959.
- [8] F. Arshad, Al. Tahir, T.U. Haq, H. Duran, I. Hussain, F. Sher, Fabrication of NiCu interconnected porous nanostructures for highly selective methanol oxidation coupled with hydrogen evolution reaction, *Int. J. Hydrogen Energy* 2022, 47, 36118–36128.
- [9] H.Q. Qiu, B.E. Yuan, C.X. Zhao, J.X. Dang, C.F. Zhang, Q. Wang, L. Xia, H. Miao, J.L. Yuan, A high-entropy and low-cobalt perovskite of  $\text{La}_{0.7}\text{Sr}_{0.3}\text{Co}_{0.2}\text{Mn}_{0.2}\text{Ni}_{0.2}\text{Fe}_{0.2}\text{Al}_{0.2}\text{O}_{3-x}$  for both oxygen evolution and methanol oxidation reactions, *Int. J. Hydrogen Energy* 2024, 51, 593–604.
- [10] F.Y. Liu, J.X. Dang, C.X. Zhao, B.E. Yuan, H.Q. Qiu, Q. Wang, C.F. Zhang, L.S. Xiao, H. Miao, J.L. Yuan, A high-efficient electrocatalyst for oxygen evolution and methanol oxidation reactions prepared by a facile and scale-up method, *J. Alloys Compd.* 2024, 981, 173745.
- [11] F.Y. Liu, F. Wu, R. Guo, J.X. Dang, H.Q. Qiu, Q.J. Zhang, C. Yang, H. Miao, J.L. Yuan, A novel

$\text{Ba}_{0.5}\text{Sr}_{0.5}\text{Co}_{0.8}\text{Fe}_{0.2}\text{O}_{3-\delta}$  and  $\text{CeO}_2$  hybrid electrocatalyst for both the oxygen evolution and methanol oxidation reactions, *Green Chem.* 2024, 26, 9433–9444.

[12] B. Mondal, N. Karjule, C. Singh, R. Shimoni, M. Volokh, I. Hod, M. Shalom, Unraveling the mechanisms of electrocatalytic oxygenation and dehydrogenation of organic molecules to value-added chemicals over a Ni-Fe oxide catalyst, *Adv. Energy Mater.* 2021, 11, 2101858.
